# Supplementary material for: The role of social networks in the development of overweight and obesity among adults: a scoping review
Source: Springer Nature journal article supplement (doi:10.1186/s12889-015-2314-0), 2015-09-30
Supplement: MOESM1 [file 9750464]

## Search Terms

|     |                                                                                                                                                                                                 |                      |
|-----|-------------------------------------------------------------------------------------------------------------------------------------------------------------------------------------------------|----------------------|
| 1.  | obes*.ti,ab.                                                                                                                                                                                    | Obesity Terms        |
| 2.  | (bodyweight or body weight).ti,ab.                                                                                                                                                              |                      |
| 3.  | overweight.ti,ab.                                                                                                                                                                               |                      |
| 4.  | (body mass index or BMI).ti,ab.                                                                                                                                                                 |                      |
| 5.  | (weight gain* or weight change*).ti,ab.                                                                                                                                                         |                      |
| 6.  | adipos*.ti,ab.                                                                                                                                                                                  |                      |
| 7.  | *Obesity/                                                                                                                                                                                       |                      |
| 8.  | *Weight Gain/                                                                                                                                                                                   |                      |
| 9.  | *Overweight/                                                                                                                                                                                    |                      |
| 10. | *Body Mass Index/                                                                                                                                                                               |                      |
| 11. | 1 or 2 or 3 or 4 or 5 or 6 or 7 or 8 or 9 or 10                                                                                                                                                 |                      |
| 12. | (famil* or friend* or neighbour* or neighbor* or spous* or sibling* or partner* or communit* or generation*).ti,ab.                                                                             | People Terms         |
| 13. | (peer* or (person adj to adj person) or (face adj to adj face)).ti,ab.                                                                                                                          |                      |
| 14. | 12 or 13                                                                                                                                                                                        |                      |
| 15. | (cluster* or contagio* or epidemi* or infect* or percepti* or spread* or rippl* or diffus*).ti,ab.                                                                                              | Cluster Terms        |
| 16. | 14 and 15                                                                                                                                                                                       |                      |
| 17. | (network* or social dynamic* or social interaction* or social tie* or social norm* or community norm* or social comparison* or social capital or social stress* or social transgression).ti,ab. | Social Network Terms |
| 18. | 11 and 16                                                                                                                                                                                       |                      |
| 19. | 11 and 17                                                                                                                                                                                       |                      |
| 20. | 18 or 19                                                                                                                                                                                        |                      |
| 21. | limit 20 to (English language and humans and yr="2002 - 2012")                                                                                                                                  |                      |
