# Supplementary material for: The role of social networks in the development of overweight and obesity among adults: a scoping review
Source: Springer Nature journal article supplement (doi:10.1186/s12889-015-2314-0), 2015-09-30
Supplement: MOESM2 [file 9750464]

## Data extraction of all included studies

| Ref list # | First author & publication date | Research questions                                                                                                                                                               | Network type | Sample characteristics (Region, gender, age range, ethnicity, SES, occupation, health status – where reported) | Continent     | Study design & methods | Findings                                                                                                                                       | Process   |
|------------|---------------------------------|----------------------------------------------------------------------------------------------------------------------------------------------------------------------------------|--------------|----------------------------------------------------------------------------------------------------------------|---------------|------------------------|------------------------------------------------------------------------------------------------------------------------------------------------|-----------|
| 35         | Burger, J. M. 2010              | What snack choices do women make when told about the snack choices of others in similar setting?                                                                                 | Peers        | USA<br>Female<br>18-22yrs<br>Higher education<br>undergraduates                                                | North America | Experimental           | Women make food choices based on a descriptive norm – what they are led to believe were the food choices of other women in a similar situation | Mirroring |
| 37         | Carrell, S. 2011                | Does being assigned to peer groups which are less fit during high school affect college fitness scores?                                                                          | Peers        | USA<br>Male and female<br>Air force Academy trainees                                                           | North America | Experimental           | People mimic the diet or exercise habits of least fit friends or use their fitness as a benchmark for their own fitness levels                 | Mirroring |
| 39         | Lemon, S. C. 2009               | Are perceptions of organizational commitment to employee health, co-worker physical activity and eating behaviours associated with BMI, physical activity and eating behaviours? | Peers        | USA<br>Male and female<br>70% White, 14% Black, 12% Black, 4% Asian<br>Hospital workers                        | North America | Quasi-experimental     | Perceptions of co-worker normative behaviours were associated with a participant's own physical activity and eating behaviours                 | Mirroring |

| Ref list # | First author & publication date | Research questions                                                                                                | Network type                       | Sample characteristics (Region, gender, age range, ethnicity, SES, occupation, health status – where reported) | Continent     | Study design & methods                   | Findings                                                                                                                                                                                                                                        | Process                     |
|------------|---------------------------------|-------------------------------------------------------------------------------------------------------------------|------------------------------------|----------------------------------------------------------------------------------------------------------------|---------------|------------------------------------------|-------------------------------------------------------------------------------------------------------------------------------------------------------------------------------------------------------------------------------------------------|-----------------------------|
| 34         | Mcferran, B. 2010               | Do people use the behaviour of others in shaping their own snacking consumption decisions?                        | Peers                              | USA<br>Female<br>Higher education undergraduates                                                               | North America | Experimental                             | People adjust portion sizes when snacking based on what other consumers select but an adjustment occurs based on the other's body type (portion size is matched when peer is thinner and reduced when peer is overweight)                       | Mirroring                   |
| 40         | Robinson, E. (2011)             | Do ingratiation strategies explain social matching of food intake in young females?                               | Peers                              | UK<br>Female<br>Mean 20yrs<br>Higher Education undergraduates                                                  | Europe        | Experimental                             | Desire for social acceptance may be an underlying cause of social matching of food intake                                                                                                                                                       | Mirroring                   |
| 38         | Ali, H. I. 2010                 | What are the weight management behaviours and perceptions of women who are at increased risk for type 2 diabetes? | Friends and family, cultural group | United Arab Emirates<br>Females<br>20–60yrs<br>Considered high risk for type 2 diabetes                        | Asia          | Cross-sectional qualitative focus groups | Weight-related behaviours affected by cultural norms – such as overeating at social engagements and perceived unacceptability of some physical activity alone<br>Competing demands (childcare and housework) was a barrier to physical activity | Mirroring<br>Social support |

| Ref list # | First author & publication date | Research questions                                                                                                                       | Network type                       | Sample characteristics (Region, gender, age range, ethnicity, SES, occupation, health status – where reported)  | Continent     | Study design & methods   | Findings                                                                                                                                                      | Process               |
|------------|---------------------------------|------------------------------------------------------------------------------------------------------------------------------------------|------------------------------------|-----------------------------------------------------------------------------------------------------------------|---------------|--------------------------|---------------------------------------------------------------------------------------------------------------------------------------------------------------|-----------------------|
| 32         | Befort, C. 2008                 | What are Obese African American women's perceptions and beliefs about body size, weight, and weight loss                                 | Friends and family, cultural group | USA<br>Female<br>18+yrs<br>African- American<br>Obese                                                           | North America | Qualitative focus groups | Desire to conform to traditional cultural practices influences food choice                                                                                    | Mirroring             |
| 33         | Bertoni, A. 2011                | What are the perceptions of perceptions of African Americans to Dietary Approaches to Stop Hypertension (DASH) and the food environment? | Friends and family                 | USA<br>Male and female<br>34-63yrs<br>African- American<br>High blood pressure<br>Living low-income communities | North America | Qualitative focus groups | Social pressure to conform to established eating habits from within family network                                                                            | Mirroring             |
| 41         | Kouvonen, A. 2012               | Is there an association between participation in social activities and weight loss?                                                      | Friends and family                 | England<br>Male and female<br>50+yrs                                                                            | Europe        | Longitudinal survey      | Older adults who participated in social activities were more likely to maintain a healthy BMI than older people who did not participate                       | Mirroring             |
| 36         | Pachucki, M. 2011               | Are eating behaviours concordant among diverse sets of social ties?                                                                      | Friends and family                 | USA<br>Male and female<br>29-85yrs                                                                              | North America | Longitudinal survey      | Consumption of alcohol and snacks was more likely to be influenced by the consumption of similar items by others within one's social network than other foods | Mirroring             |
| 10         | Hruschka, D. 2011               | Do shared body size norms play a role in the social contagion of body size and obesity?                                                  | Friends and family                 | USA<br>Female<br>18-45yrs                                                                                       | North America | Cross-sectional survey   | A network member's BMI may influence an ego's desired body size, which in turn influences an ego's BMI.                                                       | Mirroring<br>Aspiring |

| Ref list # | First author & publication date | Research questions                                                                                                                                                    | Network type                                      | Sample characteristics (Region, gender, age range, ethnicity, SES, occupation, health status – where reported) | Continent     | Study design & methods                            | Findings                                                                                                                       | Process  |
|------------|---------------------------------|-----------------------------------------------------------------------------------------------------------------------------------------------------------------------|---------------------------------------------------|----------------------------------------------------------------------------------------------------------------|---------------|---------------------------------------------------|--------------------------------------------------------------------------------------------------------------------------------|----------|
| 45         | Blanchflower, D. 2009           | What is the influence of relative weight on one's desired weight?                                                                                                     | People living within the same geographical region | Europe<br>Male and female                                                                                      | Europe        | Cross-sectional survey                            | Comparisons and relative-weight concerns influence BMI                                                                         | Aspiring |
| 44         | Bramble, J. 2009                | Examine the cultural context for notions of good health and health practices, and perception of obesity and weight management                                         | Cultural group                                    | USA<br>Female<br>40-62yrs<br>African-American and African-Caribbean                                            | North America | Qualitative interviews                            | Decisions about healthy weight made in the context of one's extended social network (the 'cultural' group one associates with) | Aspiring |
| 43         | Renzaho, A. M. N. 2012.         | Are there intergenerational differences in food, physical activity, and body size perceptions among refugees and migrants in Australia?                               | Cultural group                                    | Australia<br>Male and female (Adult group – mean age 36yrs)<br>Refugees and migrants from North East Africa    | Australia     | Qualitative interviews                            | Parents aspire to influence the weight of their children according to particular cultural ideals                               | Aspiring |
| 48         | Smith-Jackson, T. 2012          | How do people account for weight gain when starting university?                                                                                                       | Peers                                             | USA<br>Female<br>18-19yrs<br>Higher education undergraduates                                                   | North America | Cross sectional survey and qualitative interviews | Gaining weight upon starting university is often seen as inevitable and comparisons to others can influence weight gain        | Aspiring |
| 46         | Chandler-Laney, P. 2009         | Do European American and African American women take longer to lose weight and are they less likely to maintain weight loss if they perceive others to be overweight? | Peers                                             | USA<br>Female<br>22-46yrs                                                                                      | North America | Longitudinal survey                               | Perception of peers' weight influences motivation for weight loss                                                              | Aspiring |

| Ref list # | First author & publication date | Research questions                                                                                                                                          | Network type      | Sample characteristics (Region, gender, age range, ethnicity, SES, occupation, health status – where reported) | Continent     | Study design & methods      | Findings                                                                                                 | Process            |
|------------|---------------------------------|-------------------------------------------------------------------------------------------------------------------------------------------------------------|-------------------|----------------------------------------------------------------------------------------------------------------|---------------|-----------------------------|----------------------------------------------------------------------------------------------------------|--------------------|
| 47         | Klein, W. M. P. 2002.           | Do comparative risk estimates relative to the average peer predict dietary intentions and concern about absolute risk of overweight and obesity?            | Peers             | USA<br>Female<br>Higher education undergraduates                                                               | North America | Cross sectional survey      | Weight comparisons with perceived average peer can shape perceived risk of obesity and dietary intention | Aspiring           |
| 42         | Krones, P. G. 2005              | Does social comparison with attractive peers in the real world increase body dissatisfaction and negative affect                                            | Peers             | USA<br>Female<br>17-22yrs<br>Ethnically diverse group                                                          | North America | Randomised-controlled trial | Being around thinner than average people increases dissatisfaction with body weight                      | Aspiring           |
| 50         | Barthomeu, L. 2010.             | Is eating desire lower in the presence of an obese rather than a normal-weight eater and is this affected by facial expression and one's own weight status? | Ephemeral network | European<br>Male and female<br>19- 37yrs                                                                       | Europe        | Quasi-experimental          | Desire to eat affected by others' facial responses and their weight status                               | Changing behaviour |
| 49         | Mcferran, B. 2010               | Does the body type of others in vicinity affect food consumption?                                                                                           | Ephemeral network | USA<br>Female<br>Higher education undergraduates                                                               | North America | Experimental                | Dietary choices influenced by body weight of people present in the choice setting                        | Changing behaviour |

| Ref list # | First author & publication date | Research questions                                                                    | Network type       | Sample characteristics (Region, gender, age range, ethnicity, SES, occupation, health status – where reported) | Continent     | Study design & methods | Findings                                                                                                                                                                                                                                                                   | Process                      |
|------------|---------------------------------|---------------------------------------------------------------------------------------|--------------------|----------------------------------------------------------------------------------------------------------------|---------------|------------------------|----------------------------------------------------------------------------------------------------------------------------------------------------------------------------------------------------------------------------------------------------------------------------|------------------------------|
| 56         | Christian, H. 2011              | What are the individual, behavioural, social and built environment correlates of BMI? | Friends and family | Australia<br>Male and female<br>Mean age 40yrs                                                                 | Australia     | Cross sectional survey | Perceived graffiti and vandalism was positively associated with BMI, and participants who perceived that their neighbourhood was safer from crime and safer for pedestrians had a lower BMI. Perceived neighbourhood cohesion and neighbourliness not associated with BMI. | Belonging                    |
| 12         | Holtgrave, D. 2006              | Is social capital a protective factor against obesity and diabetes?                   | Friends and family | USA<br>Male and female                                                                                         | North America | Cross-sectional survey | Community organizational life, involvement in public affairs, volunteerism, informal sociability, and social trust – a combined high score is a protective factor in development of obesity                                                                                | Belonging and social support |
| 55         | Shankar, A. 2011                | What impact does social isolation and loneliness have on health-related behaviour?    | Friends and family | England<br>Male and female<br>50yrs+<br>30% with long-term limiting health condition                           | Europe        | Longitudinal survey    | Physical activity habits shaped by extent of social contact with others in social clubs                                                                                                                                                                                    | Belonging                    |
| 53         | Vaananen, A. 2009               | Is there an association between social cap and CVD risk factors?                      | Friends and family | Finland<br>Male and female<br>Public sector employees                                                          | Europe        | Cross-sectional survey | Increased workplace social capital (sense of togetherness, trust and co-operation) is associated with fewer health risk behaviours                                                                                                                                         | Belonging                    |

| Ref list # | First author & publication date | Research questions                                                                                                                                                                                            | Network type                                      | Sample characteristics (Region, gender, age range, ethnicity, SES, occupation, health status – where reported) | Continent     | Study design & methods | Findings                                                                                                                                            | Process   |
|------------|---------------------------------|---------------------------------------------------------------------------------------------------------------------------------------------------------------------------------------------------------------|---------------------------------------------------|----------------------------------------------------------------------------------------------------------------|---------------|------------------------|-----------------------------------------------------------------------------------------------------------------------------------------------------|-----------|
| 5          | Franzini, L. 2010               | Which socio-economic and ethnic disparities in neighbourhood characteristics are associated with outdoor physical activity?                                                                                   | People living within the same geographical region | USA<br>Male and female<br>Caregivers to primary-school-aged children                                           | North America | Cross-sectional survey | Being part of the community associated with increased interest in physical activity                                                                 | Belonging |
| 54         | Hystad, P. 2012                 | Is there an association between sense of belonging and likelihood of undertaking behaviour change?                                                                                                            | People living within the same geographical region | Canada<br>Male and female<br>12+yrs                                                                            | North America | Cross-sectional survey | The ways in which people relate to others in their geographical community might influence the way in which they feel about health/weight management | Belonging |
| 51         | Brabec, M. 2007                 | What is the relationship between BMI, relative income, relative social capital, village income, and village social capital?                                                                                   | People living within the same geographical region | Bolivia<br>Male and female<br>Head of household<br>Tsimane people                                              | South America | Longitudinal survey    | Comparisons with others in one's community influences BMI                                                                                           | Belonging |
| 52         | Veenstra, G. 2005               | To what degree are relationships between social capital and health embedded in local geographical contexts and influenced by demographic factors, socio-economic status, health behaviours and coping skills? | People living within the same geographical region | Canada<br>Male and female<br>Mean 46yrs                                                                        | North America | Cross-sectional survey | Participation in social groups is associated with lower body weight                                                                                 | Belonging |

| Ref list # | First author & publication date | Research questions                                                                                                                      | Network type       | Sample characteristics (Region, gender, age range, ethnicity, SES, occupation, health status – where reported) | Continent     | Study design & methods                | Findings                                                                                                       | Process        |
|------------|---------------------------------|-----------------------------------------------------------------------------------------------------------------------------------------|--------------------|----------------------------------------------------------------------------------------------------------------|---------------|---------------------------------------|----------------------------------------------------------------------------------------------------------------|----------------|
| 57         | Pollard, T. M 2003.             | Does social isolation contribute to high rates of CHD in the South Asian UK population?                                                 | Cultural group     | UK<br>Male and female<br>25-74yrs<br>Indian, Pakistani and Bangladeshi and European origin                     | Europe        | Cross-sectional survey                | Social network size and waist size might not be related                                                        | Belonging      |
| 60         | Boothe, A. 2011.                | What are the predictors of unmet social support for healthy behaviours?                                                                 | Friends and family | USA<br>Female<br>18+yrs<br>Overweight<br>Post-partum period                                                    | North America | Secondary data analysis of trial data | Social support (and expectations about such support) influences healthy behaviours.                            | Social support |
| 62         | Daniels, J. 2006.               | What are the experiences of weight loss among women?                                                                                    | Friends and family | USA<br>Female<br>32-55yrs<br>Trying to lose weight without surgery or medication                               | North America | Qualitative                           | Family demands make it harder to prioritise weight loss                                                        | Social support |
| 59         | Darlow, S. D. 2011              | What is the influence of perceived support for exercise as well as close others' exercise habits on own exercise?                       | Friends and family | USA<br>Male and female<br>18-26yrs<br>Higher education undergraduates                                          | North America | Cross-sectional survey                | Exercise habits of close others are associated with one's own exercise habits when those others offer support. | Social support |
| 64         | Hammond, R. A. 2010.            | What is the role of social influence in the obesity epidemic?                                                                           | Friends and family | Unspecified                                                                                                    | Unspecified   | Literature review                     | Stress and social support not related to BMI                                                                   | Social support |
| 58         | Johnstone, R. 2009.             | What are the barriers to uptake of and adherence to physical activity in community dwelling patients with a diagnosis of schizophrenia? | Friends and family | UK<br>Male and female<br>18-60 yrs<br>People with Schizophrenia                                                | Europe        | Qualitative interview study           | Social support influences exercise habits                                                                      | Social support |



| Ref list # | First author & publication date | Research questions                                                                                               | Network type       | Sample characteristics (Region, gender, age range, ethnicity, SES, occupation, health status – where reported) | Continent     | Study design & methods                                                 | Findings                                                                                                         | Process        |
|------------|---------------------------------|------------------------------------------------------------------------------------------------------------------|--------------------|----------------------------------------------------------------------------------------------------------------|---------------|------------------------------------------------------------------------|------------------------------------------------------------------------------------------------------------------|----------------|
| 61         | Mackert, M. 2011                | Does social undermining influence health behaviours?                                                             | Friends and family | USA<br>Male and female<br>Mean age 43yrs                                                                       | North America | Cross-sectional, online survey. Qualitative and quantitative component | Undermining affects health behaviour change                                                                      | Social support |
| 61         | Rohrer, J. E. 2004              | Is there an association between social support and obesity prevalence?                                           | Friends and family | USA<br>Female<br>Low income<br>48% obese                                                                       | North America | Cross sectional survey                                                 | Family responsibilities might be associated with obesity                                                         | Social support |
| 66         | Verheijden, M. 2005.            | What role does social support play in weight loss interventions?                                                 | Friends and family | Unspecified                                                                                                    | Unspecified   | Literature review                                                      | Social support might not be related to weight intervention outcomes                                              | Social support |
| 65         | Sobal, J. 2006..                | How does being overweight impact on social relationships?                                                        | Paired network     | Unspecified                                                                                                    | Global        | Literature review                                                      | People who are overweight might have less social support                                                         | Social support |
| 67         | Aruguete, M. S. 2009.           | How is choice of romantic partner influenced by weight?                                                          | Paired network     | USA<br>Male and female<br>Undergraduate students                                                               | North America | Cross-sectional survey                                                 | Obese people prefer heavier partners                                                                             | Homophily      |
| 70         | Averett, S. L. 2008.            | Is there an association between relationship status and BMI?                                                     | Paired network     | USA<br>Male and female<br>14-22 yrs                                                                            | North America | Longitudinal survey                                                    | Seeking marriage can lower BMI, social obligations that develop through being in a relationship can increase BMI | Homophily      |
| 69         | Nelson, L. D. 2005              | Do situational feelings of resource scarcity predict personal preferences for prospective partner's body weight? | Paired network     | USA<br>Male and female<br>Higher education undergraduates                                                      | North America | Quasi-experimental                                                     | How one sees oneself in relation to others determines choices about body weight acceptability of partner         | Homophily      |

| Ref list # | First author & publication date | Research questions                                                                                                                             | Network type       | Sample characteristics (Region, gender, age range, ethnicity, SES, occupation, health status – where reported) | Continent     | Study design & methods | Findings                                                                   | Process   |
|------------|---------------------------------|------------------------------------------------------------------------------------------------------------------------------------------------|--------------------|----------------------------------------------------------------------------------------------------------------|---------------|------------------------|----------------------------------------------------------------------------|-----------|
| 4          | Apolloni, A. 2011               | Do marginalised children and young people remain marginalised in adulthood? Does obesity precede marginalisation or vice versa?                | Friends and family | USA<br>Male and female<br>Young adults<br>Ethnically diverse population                                        | North America | Longitudinal survey    | Obesity precedes social isolation – particularly White Americans           | Homophily |
| 71         | O'Malley, A. J. 2011            | What effect do health traits have on changes in friendship ties?                                                                               | Friends and family | USA<br>Male and female                                                                                         | North America | Statistical modelling  | People of similar BMI are less likely to dissolve existing ties            | Homophily |
| 68         | Sikorskia, C. 2015              | To what extent does BMI influence social distancing?                                                                                           | Friends and family | Germany<br>Male and female                                                                                     | Europe        | Cross-sectional survey | Seeing marriage lowers BMI                                                 | Homophily |
| 7          | VanderWeele, T. J. 2011.        | To what extent might supposed contagion effects for obesity, smoking, happiness, and loneliness be explained away by homophily or confounding? | Friends and family | USA<br>Male and female                                                                                         | North America | Longitudinal survey    | Social selection only partly accounts for the social clustering of obesity | Homophily |
